# Supplementary material for: Construction of imine–hydrazone dual linkage covalent organic frameworks
Source: Royal Society of Chemistry journal article supplement (doi:10.1039/d4cc03708a), 2024-01-01
Supplement: d4cc03708a1.pdf [file d4cc03708a1.pdf]

## Supporting Information

### **Construction of imine-hydrazone dual linkages covalent organic frameworks**

Yubao Lan,<sup>#</sup> Yufeng Gong,<sup>#</sup> Xiaoya Pang, Yanjun Feng, Yi Ran, Huixia Guo,  
Xiaoquan Lu\*

Key Laboratory of Water Security and Water Environment Protection in Plateau Intersection (Ministry of Education), Key Laboratory of Bioelectrochemistry and Environmental Analysis of Gansu Province, College of Chemistry and Chemical Engineering, Northwest Normal University, Lanzhou 730070, P. R. China.

E-mail: luxq@nwnu.edu.cn

<sup>#</sup> Yubao Lan and Yufeng Gong contributed equally.

#### **A. General Information**

#### **B. Synthesis of Monomers**

#### **C. Liquid <sup>1</sup>H NMR and <sup>13</sup>C NMR Spectra**

#### **D. Synthesis and Characterization of DL-COF-42**

#### **E. Synthesis and Characterization of DL-COF-43**

#### **F. Synthesis and Characterization of DL-COF-44**

#### **G. Fluorescence Detection of TC**

## A. General Information

### **Reagents**

All reagents and solvents were obtained from commercial sources and used as received. 1,3,5-Triformylbenzene (TFB), 1,3,5-tri(4-formylphenyl)benzene (TFPB), 4',4''',4''''',4''''''-(ethene-1,1,2,2-tetrayl)tetrakis (([1,1'-biphenyl]-4-carbaldehyde)) (ETTTA) were obtained from Jilin Chinese Academy of Sciences Yanshen Technology Co., Ltd. Methyl 2-methoxy-4-aminobenzoate, tetracycline hydrochloride (TC), tetrahydrofuran (THF), 1,4-dioxane, mesitylene and sulfamethoxazole (SMZ) were obtained from Energy Chemical. AcOH was obtained from Shanghai Macklin Biochemical Co., Ltd. Roxithromycin (RXM), sulfadiazine (SD), ampicillin (AMP) and *L*-Histidine (*L*-His) were obtained from Beijing InnoChem Science & Technology Co., Ltd. *L*-Cysteine (*L*-Cys) and *L*-Valine (*L*-Val) were obtained from Shanghai Titan Scientific Co., Ltd. Sodium chloride (NaCl), potassium chloride (KCl) and calcium chloride (CaCl<sub>2</sub>) were obtained from Shanghai Hushi Laboratorial Equipment Co., Ltd. KBr was obtained from Alab (Shanghai) Chemical Technology Co., Ltd.

### **Fluorescent measurements**

Disperse 3.0 mg DL-COF-44 in 3 mL DMF with the assistance via ultrasonic (30 min). Take DL-COF-44 stock solution (40  $\mu$ L) and different concentrations of TC were loaded into several centrifugal tubes (2.0 mL) and diluted to 2 mL with DMF. After 1 min of ultrasound, the fluorescence changes of each system were monitored under 323 nm excitation in a quartz test tube at 25 °C.

### **Instruments and sample preparation**

*FT-IR spectra* were recorded on a Nicolet NEXUS 670 instrument by using KBr pellet.

*Powder X-ray diffraction (PXRD) data* were collected on a Rigaku-binary diffractometer operated at 40 kV and 40 mA with Cu K $\alpha$  radiation (step size of 0.017° and step time of 1 s).

*Fluorescence spectra* were recorded at room temperature using Edinburgh FS5 and Edinburgh FLS1000 combined fluorescence lifetime & steady state spectrometer.

*Solid-state NMR experiments* were performed on a Bruker WB Avance II 400 MHz spectrometer. Solid-state <sup>13</sup>C cross-polarization magic-angle spinning (<sup>13</sup>C CP/MAS NMR) spectra were recorded with a 4-mm double-resonance MAS probe; a sample spinning rate of 10.0 kHz, a contact time of 3 ms (ramp 100), and a pulse delay of 3 s were applied.

*Field emission scanning electron microscopy (SEM) observations* were performed on a Hitachi S-4800 microscope operated at an accelerating voltage of 5.0 kV.

*The thermal properties of COF samples* were evaluated with a STA PT1600 Linseis thermogravimetric analysis (TGA) instrument over the temperature range of 25 to 800 °C under nitrogen atmosphere with a heating rate of 10 °C/min.

*Nitrogen adsorption and desorption isotherms* were recorded at 77 K with a Micromeritics ASAP 2020M system. Prior to the measurement of the sorption isotherm, the samples were degassed for 8 h at 120 °C. Surface areas were calculated using the Brunauer-Emmett-Teller (BET) method. The pore-size-distribution curves were obtained via the non-local density functional theory (NLDFT).

## B. Synthesis of Monomer

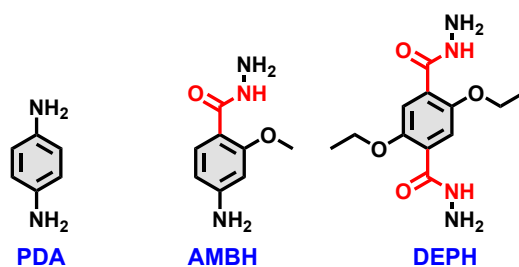

**Scheme S1** The chemical structure of building blocks with difference molecule size and functional groups.

### *Synthesis of AMBH*

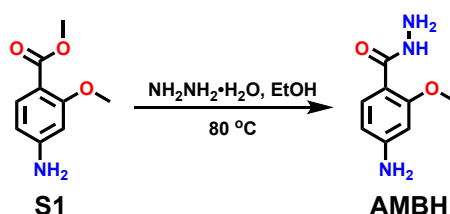

**Scheme S2** Synthetic route of AMBH.

### 4-amino-2-methoxybenzohydrazide (AMBH)

Methyl 4-amino-2-methoxybenzoate **S1** (5.0 g, 27.6 mmol) was dissolved in EtOH (50 mL) in a 100 mL round bottom flask equipped with a stir bar. Hydrazine hydrate (10.0 mL, 205 mmol) was added and the flask was then equipped with a condenser and heated to reflux for 48 h. The reaction was then allowed to cool to room temperature, and a white precipitate formed. The flask was then placed in the freezer for 5.0 h. The white solids were isolated by filtration, washed three times with EtOH, and dried under vacuum. **AMBH** was isolated as white solids (4.25 g, 85%).

**AMBH:**  $^1\text{H NMR}$  (400 MHz,  $\text{DMSO-}d_6$ )  $\delta$  = 8.73 (s, 1H), 7.59 (d,  $J$  = 8.4, 1H), 6.22 (d,  $J$  = 2.0, 1H), 6.19 (dd,  $J$  = 8.4, 2.0 Hz, 1H), 5.65 (s, 2H), 4.31 (s, 2H), 3.80 (s, 3H);  $^{13}\text{C NMR}$  (150 MHz,  $\text{DMSO-}d_6$ )  $\delta$  = 165.3, 158.8, 153.2, 132.3, 108.0, 106.2, 96.0, 55.3. **HRMS (ESI):**  $m/z$  calcd. for  $[\text{C}_8\text{H}_{11}\text{O}_2\text{N}_3 + \text{H}]^+$  182.0924, found 182.0925.

### C. Liquid $^1\text{H}$ NMR and $^{13}\text{C}$ NMR Spectra

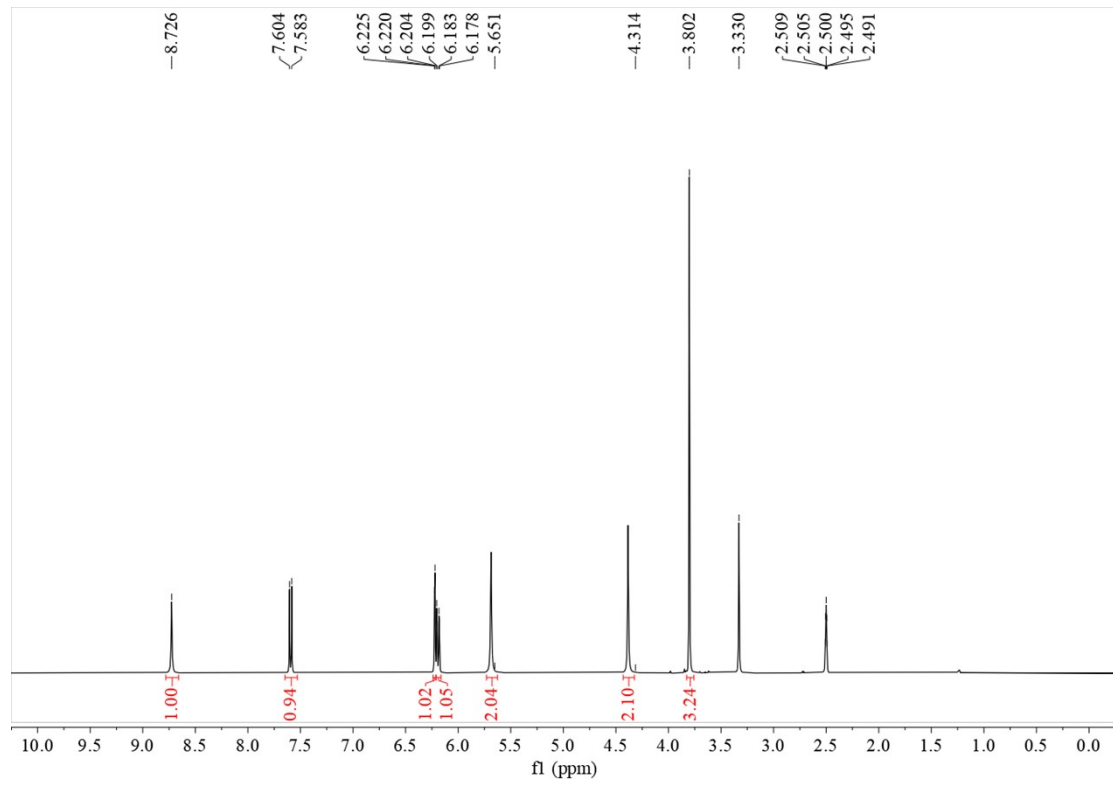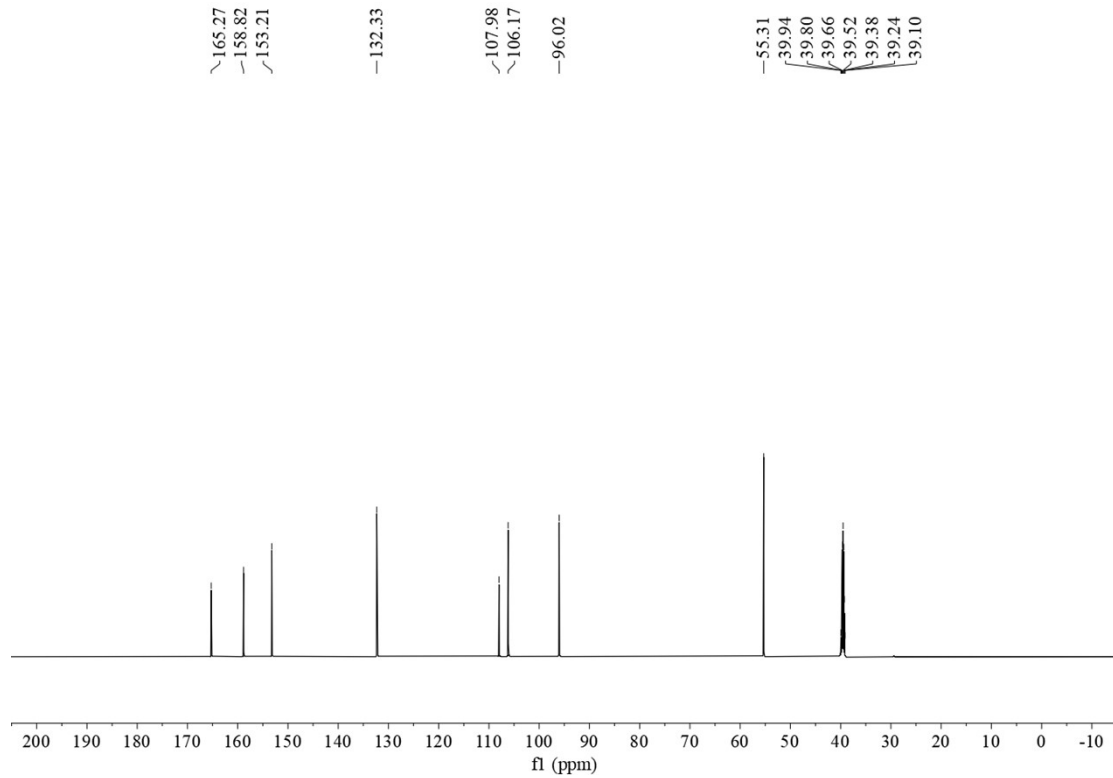

## D. Synthesis and Characterization of DL-COF-42

### Synthesis of DL-COF-42

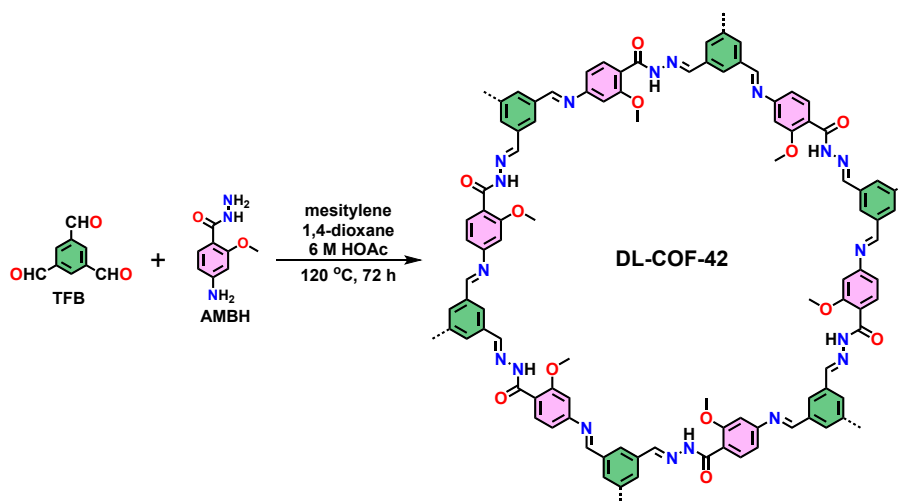

**Scheme S3** Synthesis of DL-COF-42 via the condensation of TFB and AMBH.

To a 15 mL pressure tube were added the **AMBH** (43.5 mg, 0.24 mmol), **TFB** (26.0 mg, 0.16 mmol). Then 1,4-dioxane (0.10 mL) and mesitylene (1.0 mL) were added sequentially. The ampoule was shaken until the slurry was well dispersed. After the dropwise addition of 6 M aqueous acetic acid (0.20 mL), the pressure tube was capped and then placed in an oven at 120 °C for 3 days. The solids were isolated by centrifugation and washed with THF (3 × 5 mL) and acetone (2 × 5 mL). The resulted offwhite solids were dried at room temperature, purified by Soxhlet extraction with THF (24 h). The COF materials were collected and dried at 80 °C for 12 h (85% yield).

Characterization of DL-COF-42

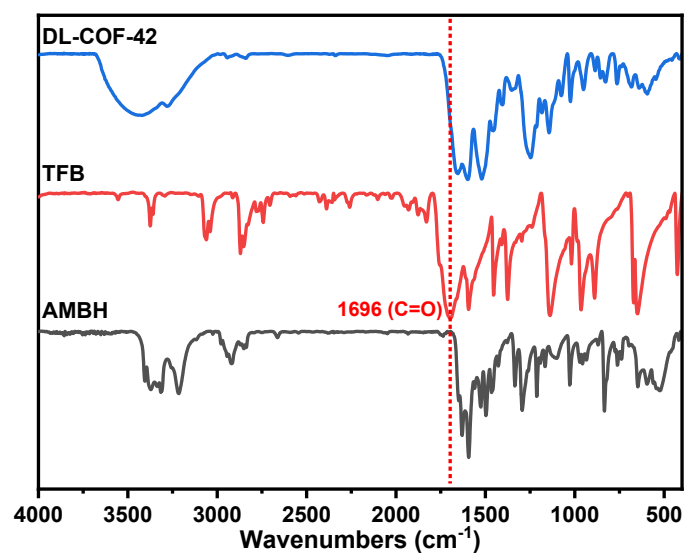

**Fig. S1** FT-IR spectra of DL-COF-42 (blue), TFB (red) and AMBH (black).

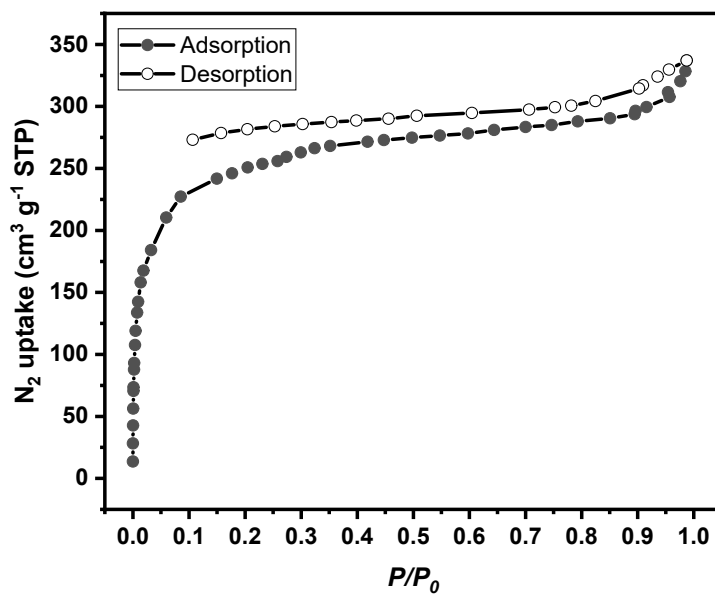

**Fig. S2** N<sub>2</sub> adsorption (filled symbols) and desorption (empty symbols) isotherms of DL-COF-42, showing a type-I isotherm characteristic for a microporous structure.

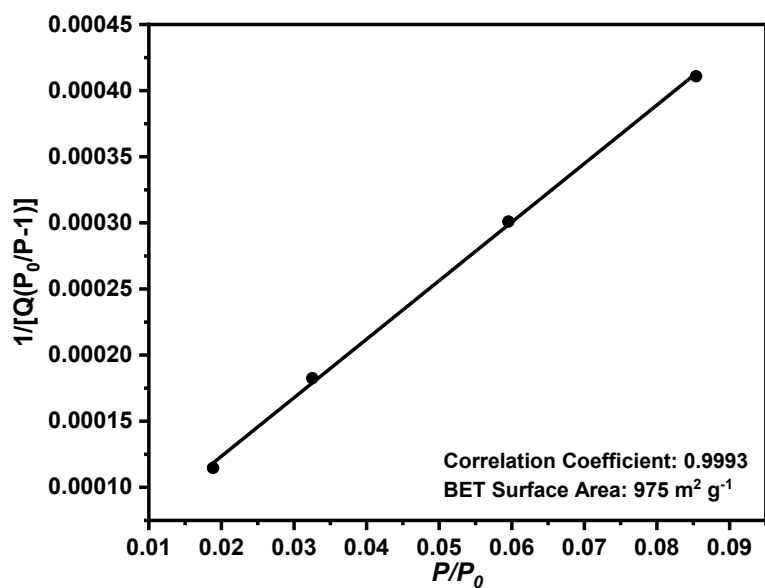

**Fig. S3** BET surface area plot for DL-COF-42 calculated from the N<sub>2</sub> adsorption isotherm.

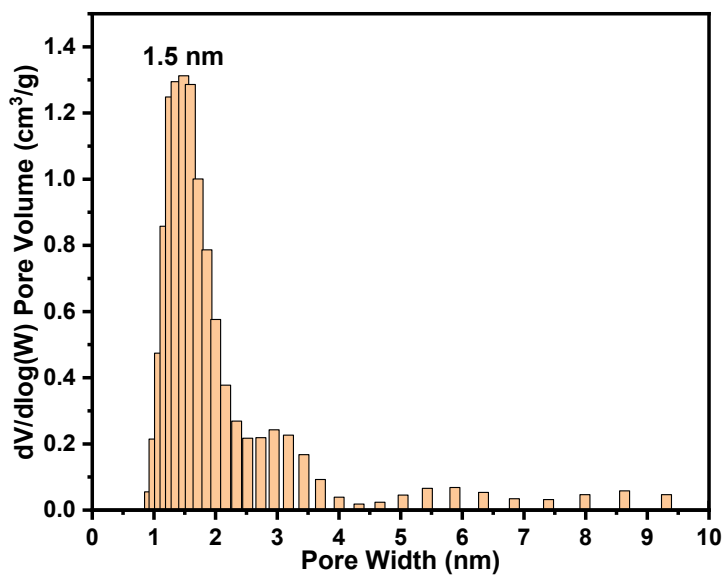

**Fig. S4** Pore-size distribution of DL-COF-42 calculated by NLDFT (slit pores model).



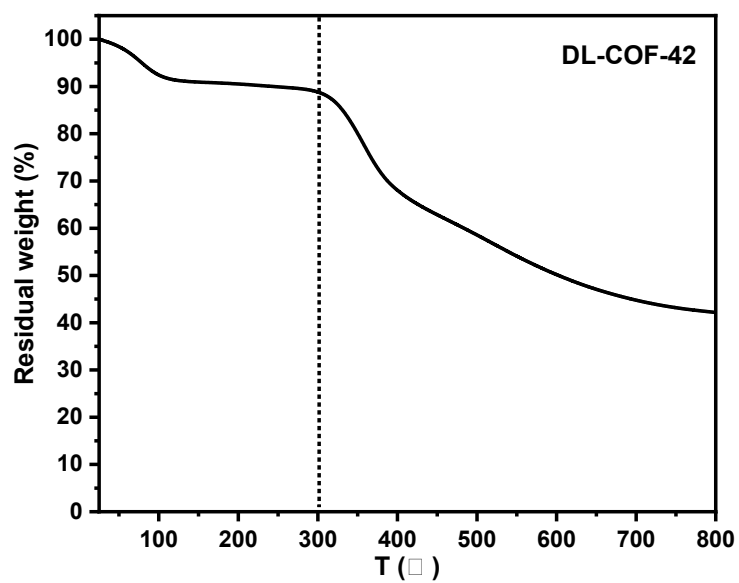

**Fig. S5** TGA curve of DL-COF-42, which is thermally stable up to 300 °C.

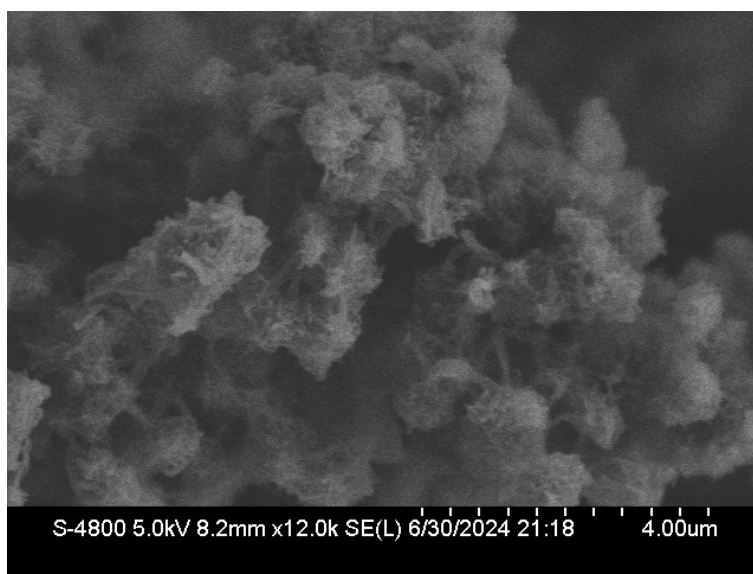

**Fig. S6** SEM image of DL-COF-42.

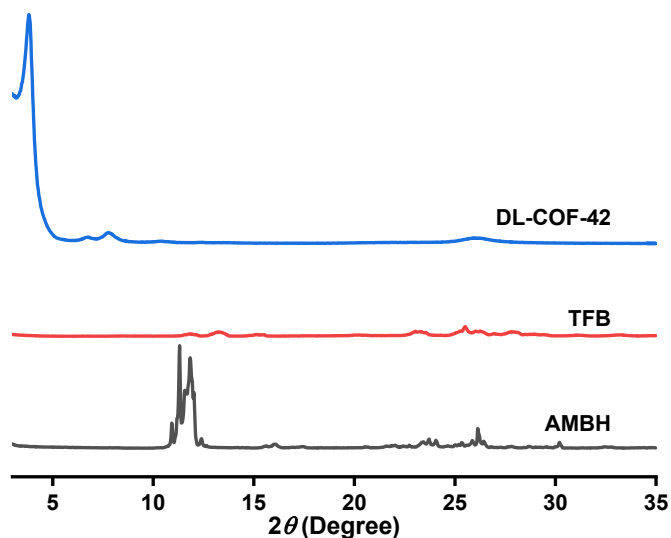

**Fig. S7** Comparison of the PXRD patterns of DL-COF-42 (blue), **TFB** (red), and **AMBH** (black).

**Structural modeling of DL-COF-42.** Structural modeling of DL-COF-42 was generated using the Materials Studio (ver. 8.0) suite of programs. Possible stacking models (eclipsed and staggered) were constructed and optimized using the Forcite module; the calculated PXRD pattern was generated with the Reflex Plus module. Pawley refinement produced the refined PXRD profile with the lattice parameters of  $a = b = 25.873 (\pm 0.294) \text{ \AA}$  and  $c = 3.686 (\pm 0.040) \text{ \AA}$ .  $R_{wp}$  and  $R_p$  values converged to 2.78% and 2.16%, respectively. Comparison of the observed and the simulated PXRD patterns (**Fig. S8**) suggested that the preferable structure of DL-COF-42 is the eclipsed arrangement.

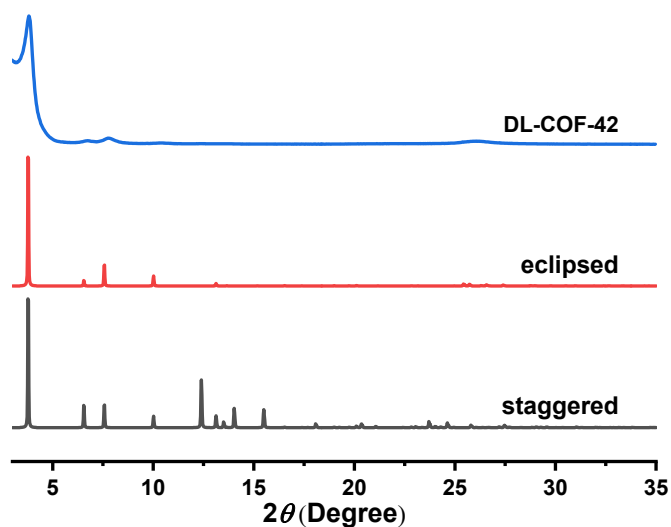

**Fig. S8** PXRD patterns of DL-COF-42 observed (blue) and calculated with the

eclipsed (red) and staggered (black) stacking models.

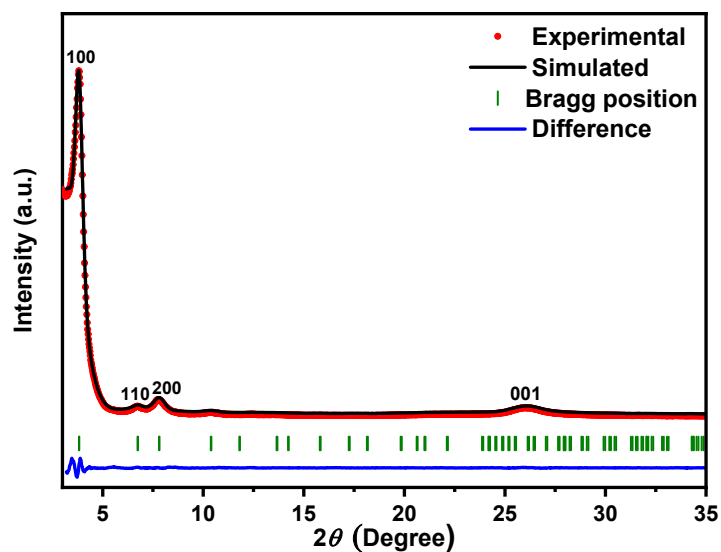

**Fig. S9** Pawley refinement for the PXRD pattern of DL-COF-42.

**Table S1** Fractional atomic coordinates for the unit cell of DL-COF-42.

| DL-COF-42: Space group $P3$                             |         |          |          |      |         |          |          |
|---------------------------------------------------------|---------|----------|----------|------|---------|----------|----------|
| $a = b = 25.873 \text{ \AA}, c = 3.686 \text{ \AA}$     |         |          |          |      |         |          |          |
| $\alpha = \beta = 90.000^\circ, \gamma = 120.000^\circ$ |         |          |          |      |         |          |          |
| Atom                                                    | x       | y        | z        | Atom | x       | y        | z        |
| C1                                                      | 2.64881 | -0.72519 | -0.91594 | N16  | 2.16122 | -0.92516 | -1.04192 |
| C2                                                      | 2.6847  | -0.60756 | -0.91567 | C17  | 2.54572 | -0.75184 | -0.90258 |
| C3                                                      | 2.01654 | -0.9418  | -1.04179 | C18  | 2.12033 | -0.91266 | -1.03974 |
| C4                                                      | 1.95791 | -0.98329 | -1.04174 | O19  | 2.42112 | -0.71875 | -1.15181 |
| C5                                                      | 2.40596 | -0.76741 | -1.04636 | H20  | 2.63489 | -0.77045 | -0.91168 |
| C6                                                      | 2.34303 | -0.80994 | -1.0309  | H21  | 2.02945 | -0.89678 | -1.04118 |
| C7                                                      | 2.31996 | -0.86906 | -1.10423 | H22  | 2.32122 | -0.74494 | -0.89123 |
| O8                                                      | 2.35673 | -0.88978 | -1.2053  | H23  | 2.21869 | -0.80889 | -0.88183 |
| C9                                                      | 2.30491 | -0.78979 | -0.95384 | H24  | 2.24192 | -0.95029 | -1.1868  |
| C10                                                     | 2.24559 | -0.82668 | -0.95182 | H25  | 2.33735 | -0.97494 | -1.25054 |
| C11                                                     | 2.22222 | -0.88515 | -1.03549 | H26  | 2.30907 | -0.96013 | -0.82986 |
| C12                                                     | 2.25981 | -0.90565 | -1.11131 | H27  | 2.38467 | -0.93438 | -0.8705  |
| C13                                                     | 2.34588 | -0.94225 | -1.03013 | H28  | 2.43499 | -0.82097 | -0.82651 |
| N14                                                     | 2.44699 | -0.78073 | -0.94003 | H29  | 2.53398 | -0.79591 | -0.84704 |
| N15                                                     | 2.50567 | -0.73915 | -0.96007 | H30  | 2.13027 | -0.86857 | -1.04216 |

## E. Synthesis and Characterization of DL-COF-43

### *Synthesis of DL-COF-43*

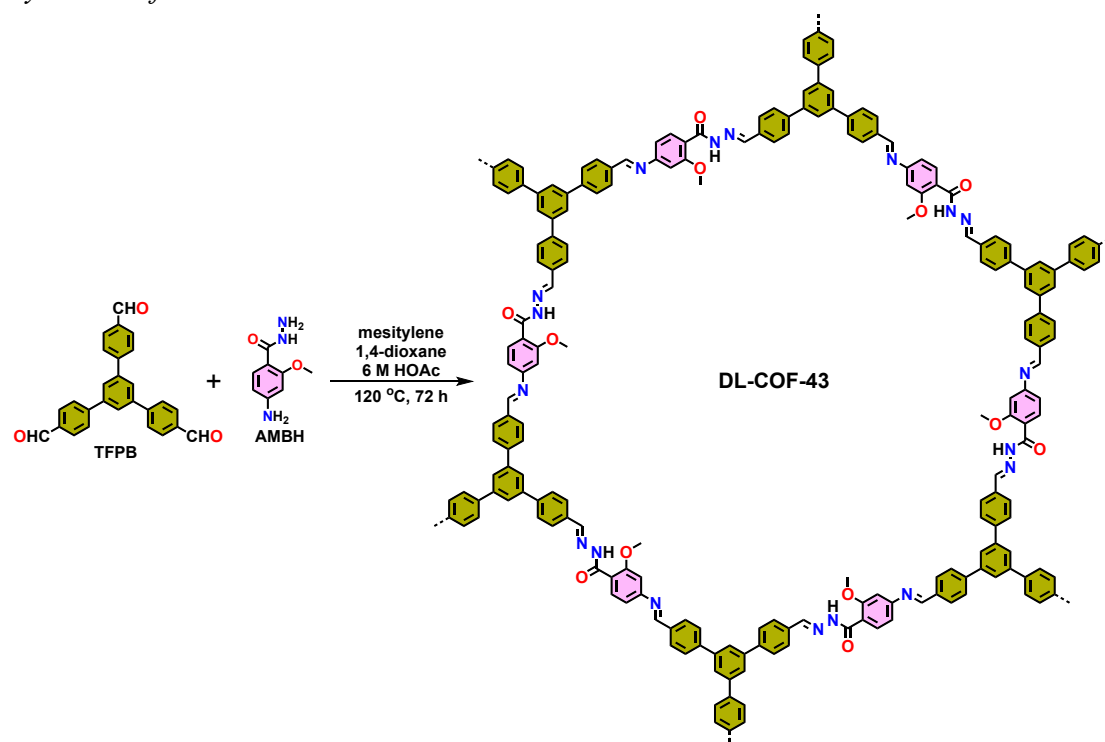

**Scheme S4** Synthesis of DL-COF-43 via the condensation of **TFPB** and **AMBH**.

The synthetic procedure of DL-COF-43 was similar to that of DL-COF-42. Condensation of monomer **TFPB** (62.5 mg, 0.16 mmol) and **AMBH** (43.5 mg, 0.24 mmol) afforded DL-COF-43 as a offwhite powder. Further purification of DL-COF-43 was carried out by Soxhlet extraction in THF for 24 h (79% yield).

Characterization of DL-COF-43

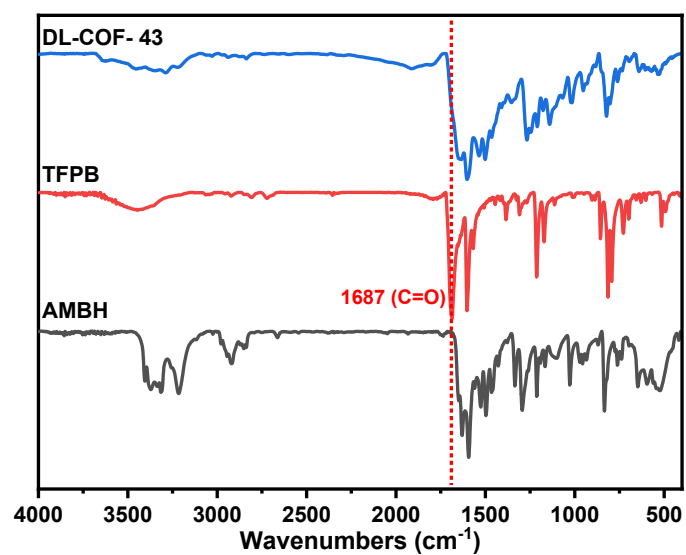

**Fig. S10** FT-IR spectra of DL-COF-43 (blue), TFPB (red) and AMBH (black).

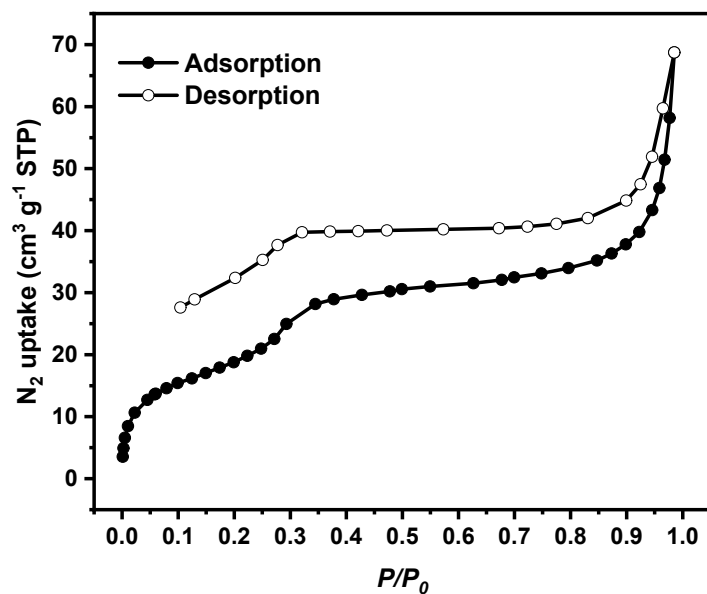

**Fig. S11** N<sub>2</sub> adsorption (filled symbols) and desorption (empty symbols) isotherms of DL-COF-43, shows a type-IV isotherm characteristic for a mesoporous structure.

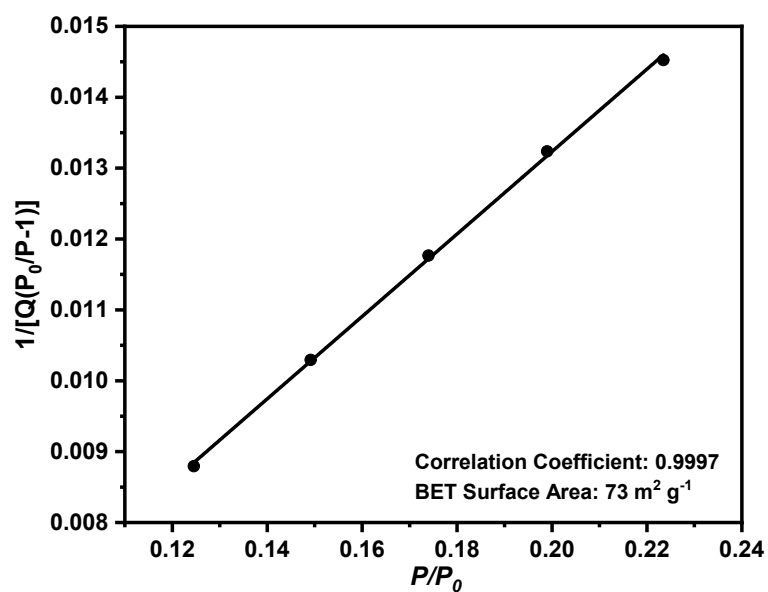

**Fig. S12** BET surface area plot for DL-COF-43 calculated from the N<sub>2</sub> adsorption isotherm.

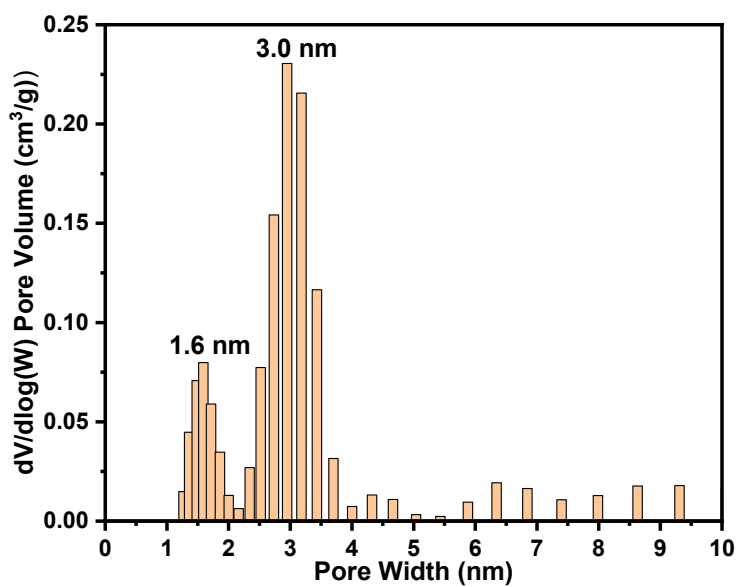

**Fig. S13** Pore-size distribution of DL-COF-43 calculated by NLDFIT (slit pores model).

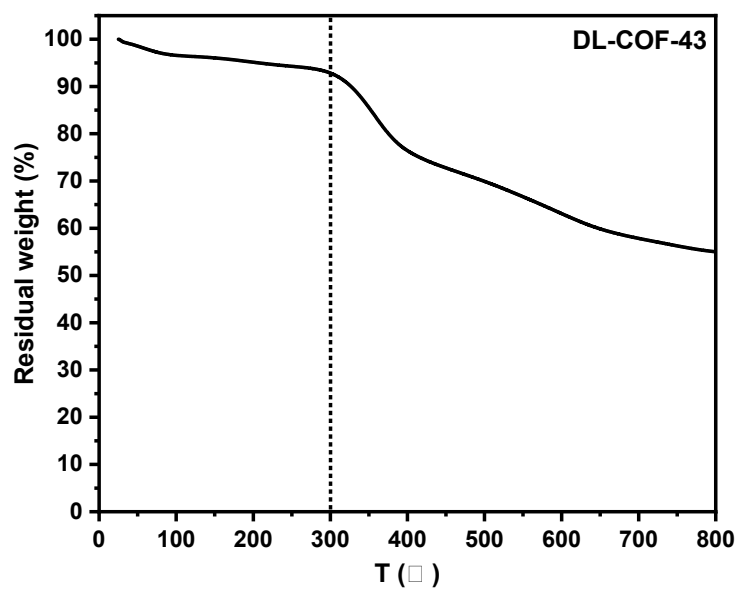

**Fig. S14** TGA curve of DL-COF-43, which is thermally stable up to 300 °C.

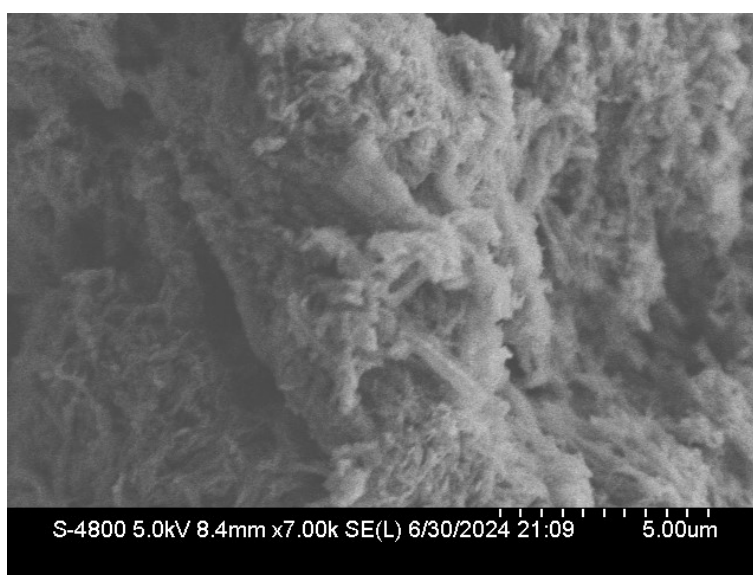

**Fig. S15** SEM image of DL-COF-43.

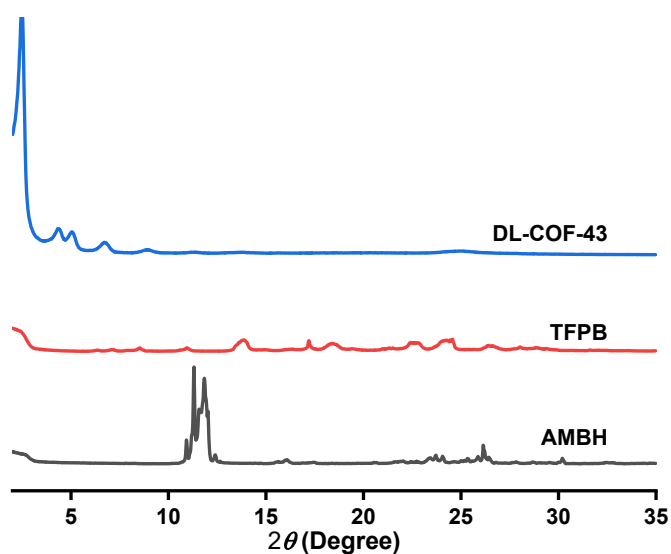

**Fig. S16** Comparison of the PXRD patterns of DL-COF-43 (blue), TFPB (red), and AMBH (black).

**Structural modeling of DL-COF-43.** Structural modeling of DL-COF-43 was generated using the Materials Studio (ver. 8.0) suite of programs. Possible stacking models (eclipsed and staggered) were constructed and optimized using the Forcite module; the calculated PXRD pattern was generated with the Reflex Plus module. Pawley refinement produced the refined PXRD profile with the lattice parameters of  $a = b = 40.470 (\pm 0.704) \text{ \AA}$  and  $c = 3.849 (\pm 0.064) \text{ \AA}$ .  $R_{wp}$  and  $R_p$  values converged to 3.77% and 2.87%, respectively. Comparison of the observed and the simulated PXRD patterns (**Fig. S17**) suggested that the preferable structure of DL-COF-43 is the eclipsed arrangement.

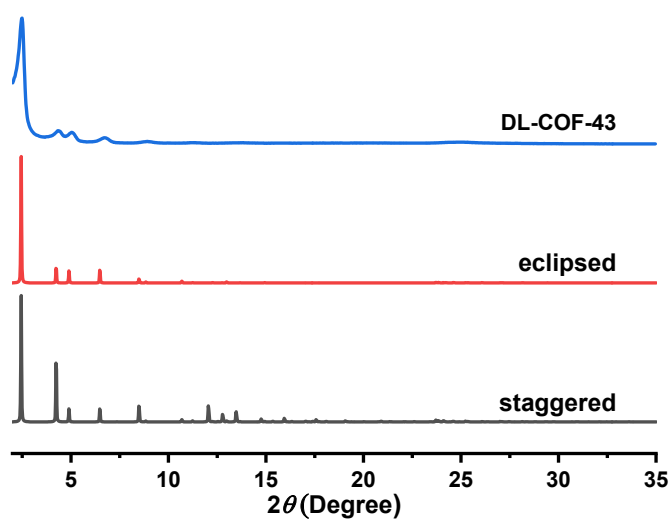

**Fig. S17** PXRD patterns of DL-COF-43 observed (blue) and calculated with the



eclipsed (red) and staggered (black) stacking models.

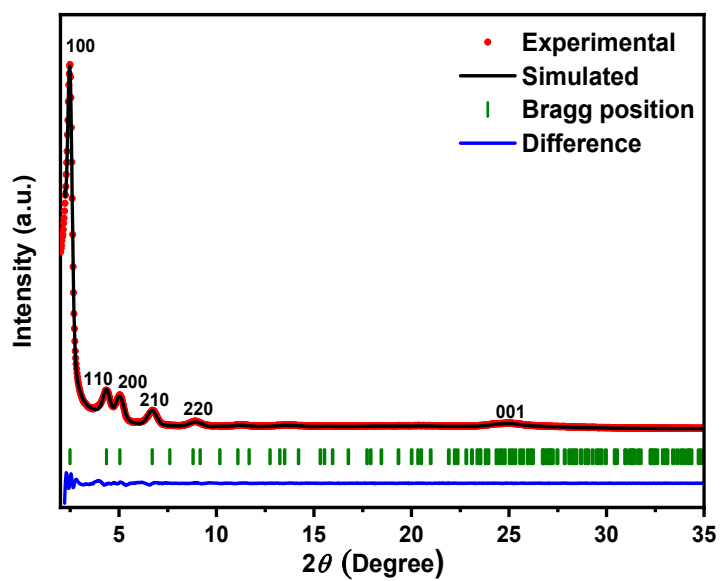

**Fig. S18** Pawley refinement for the PXRD pattern of DL-COF-43.

**Table S2** Fractional atomic coordinates for the unit cell of DL-COF-43.

| DL-COF-43: Space group $P3$                             |         |          |          |      |         |          |          |
|---------------------------------------------------------|---------|----------|----------|------|---------|----------|----------|
| $a = b = 40.470 \text{ \AA}, c = 3.849 \text{ \AA}$     |         |          |          |      |         |          |          |
| $\alpha = \beta = 90.000^\circ, \gamma = 120.000^\circ$ |         |          |          |      |         |          |          |
| Atom                                                    | x       | y        | z        | Atom | x       | y        | z        |
| C1                                                      | 1.10383 | -0.96506 | -0.82852 | C23  | 1.3336  | -0.76781 | -0.54423 |
| C2                                                      | 1.14247 | -0.94267 | -0.83926 | N24  | 1.26065 | -0.86905 | -0.92668 |
| C3                                                      | 1.13617 | -0.89472 | -1.13767 | N25  | 1.22232 | -0.89365 | -0.91359 |
| C4                                                      | 1.0976  | -0.91741 | -1.13592 | N26  | 1.44423 | -0.78191 | -0.87724 |
| C5                                                      | 1.08063 | -0.95295 | -0.97903 | C27  | 1.19948 | -0.88256 | -1.00448 |
| C6                                                      | 1.03918 | -0.97714 | -0.97403 | C28  | 1.15891 | -0.90721 | -0.99244 |
| C7                                                      | 1.01605 | -0.96145 | -0.97338 | C29  | 1.46826 | -0.7907  | -0.99093 |
| C8                                                      | 1.53231 | -0.77553 | -1.132   | C30  | 1.50854 | -0.76455 | -0.98289 |
| C9                                                      | 1.57068 | -0.7516  | -1.13121 | O31  | 1.27503 | -0.91438 | -0.8105  |
| C10                                                     | 1.58642 | -0.7162  | -0.97263 | H32  | 1.02842 | -0.9317  | -0.9737  |
| C11                                                     | 1.56219 | -0.70552 | -0.81983 | H33  | 1.09236 | -0.99147 | -0.69373 |
| C12                                                     | 1.52372 | -0.72923 | -0.82844 | H34  | 1.15941 | -0.95279 | -0.72053 |
| C13                                                     | 1.62767 | -0.69073 | -0.9678  | H35  | 1.14835 | -0.86759 | -1.26058 |
| C14                                                     | 1.65199 | -0.70504 | -0.96712 | H36  | 1.08136 | -0.90718 | -1.26679 |
| C15                                                     | 1.28653 | -0.88148 | -0.86164 | H37  | 1.34007 | -0.89657 | -1.05216 |
| C16                                                     | 1.32714 | -0.85509 | -0.86627 | H38  | 1.40689 | -0.85527 | -1.06308 |
| C17                                                     | 1.34222 | -0.81761 | -0.76325 | H39  | 1.39381 | -0.76521 | -0.69089 |
| O18                                                     | 1.31774 | -0.80563 | -0.64664 | H40  | 1.52109 | -0.80253 | -1.25591 |
| C19                                                     | 1.3511  | -0.868   | -0.97136 | H41  | 1.58775 | -0.76074 | -1.26386 |
| C20                                                     | 1.38939 | -0.84431 | -0.97896 | H42  | 1.57275 | -0.67924 | -0.6843  |
| C21                                                     | 1.40483 | -0.80702 | -0.87811 | H43  | 1.50595 | -0.72024 | -0.7072  |
| C22                                                     | 1.38125 | -0.79394 | -0.7706  | H44  | 1.64067 | -0.73467 | -0.96731 |

## F. Synthesis and Characterization of DL-COF-44

### Synthesis of DL-COF-44

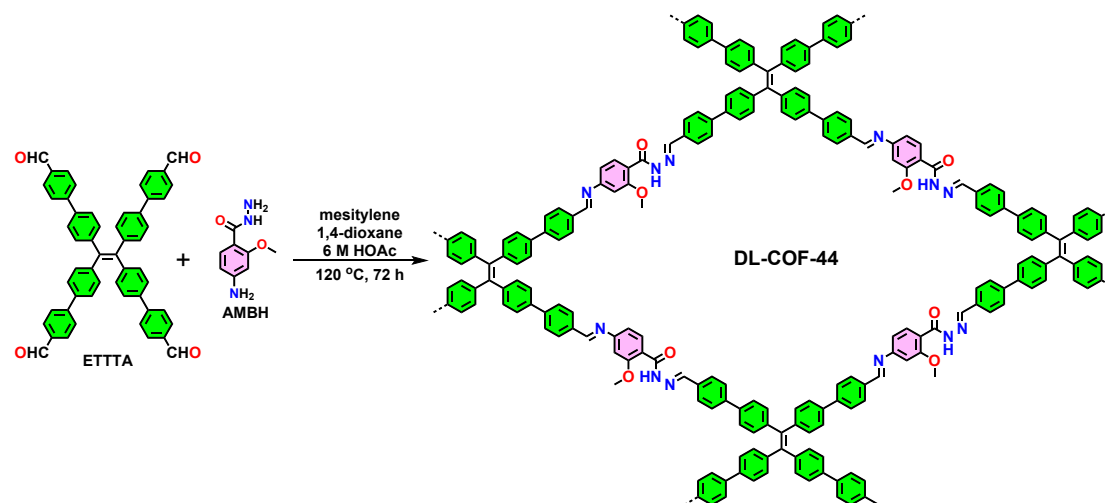

**Scheme S5** Synthesis of DL-COF-44 via the condensation of **ETTA** and **AMBH**.

The synthetic procedure of DL-COF-44 was similar to that of DL-COF-42. Condensation of monomer **ETTA** (60.0 mg, 0.08 mmol) and **AMBH** (29.0 mg, 0.16 mmol) afforded DL-COF-44 as a yellow powder. Further purification of DL-COF-44 was carried out by Soxhlet extraction in THF for 24 h (74% yield).

### Characterization of DL-COF-44

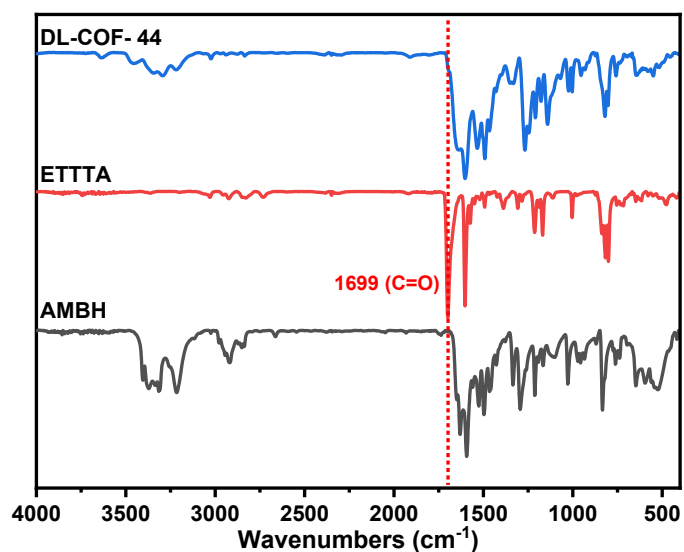

**Fig. S19** FT-IR spectra of DL-COF-44 (blue), **ETTA** (red) and **AMBH** (black).

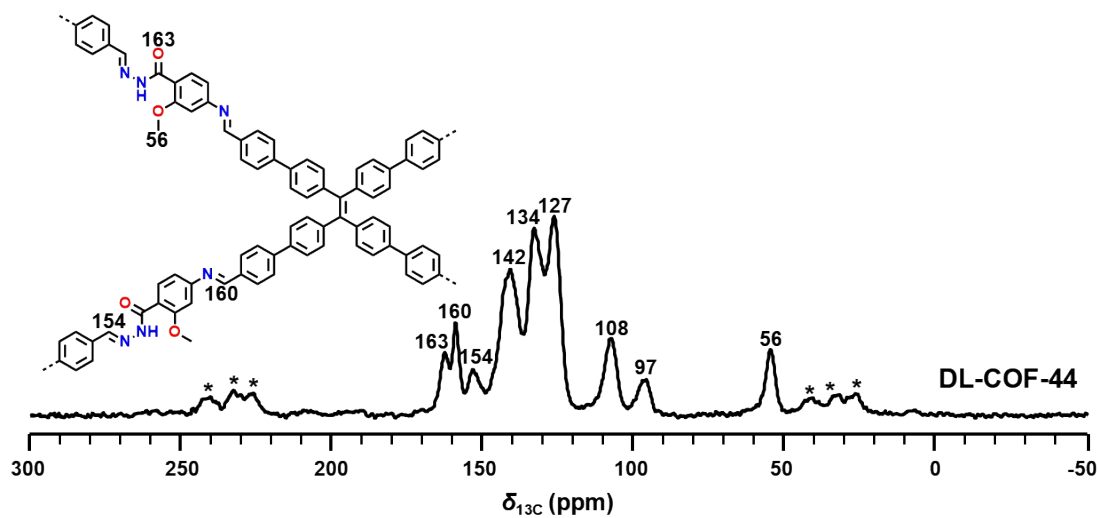

**Fig. S20** Solid-state  $^{13}\text{C}$  CP/MAS NMR spectrum of DL-COF-44. Asterisks denote the spinning sidebands.

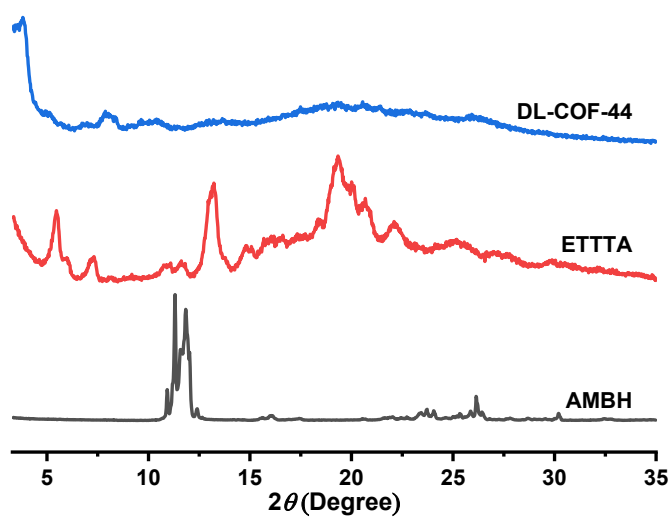

**Fig. S21** Comparison of the PXRD patterns of DL-COF-44 (blue), ETTA (red), and AMBH (black).

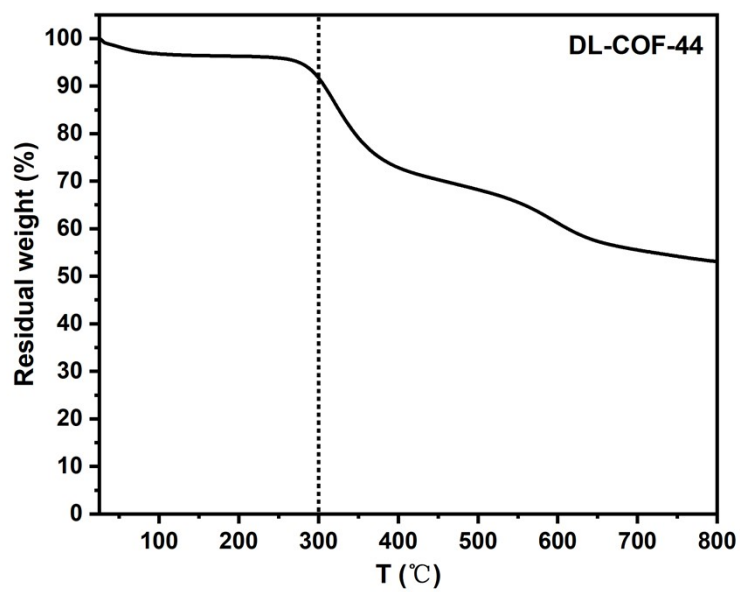

**Fig. S22** TGA curve of DL-COF-44, which is thermally stable up to 300 °C.

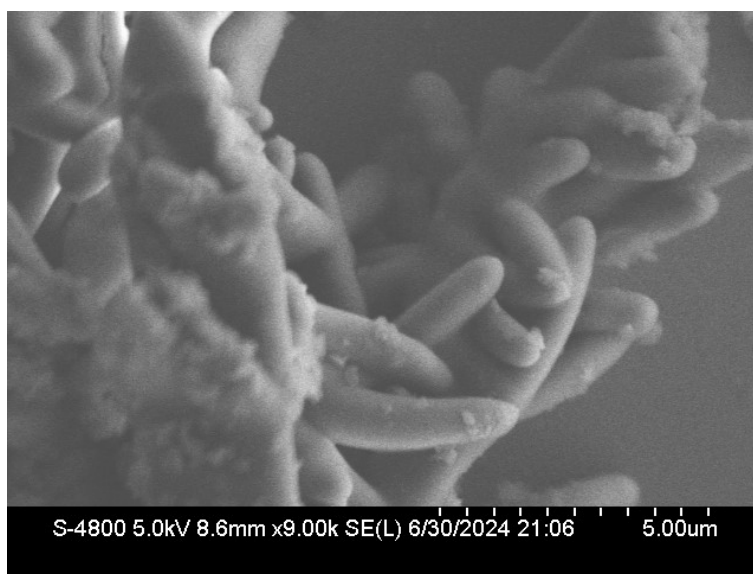

**Fig. S23** SEM image of DL-COF-44.

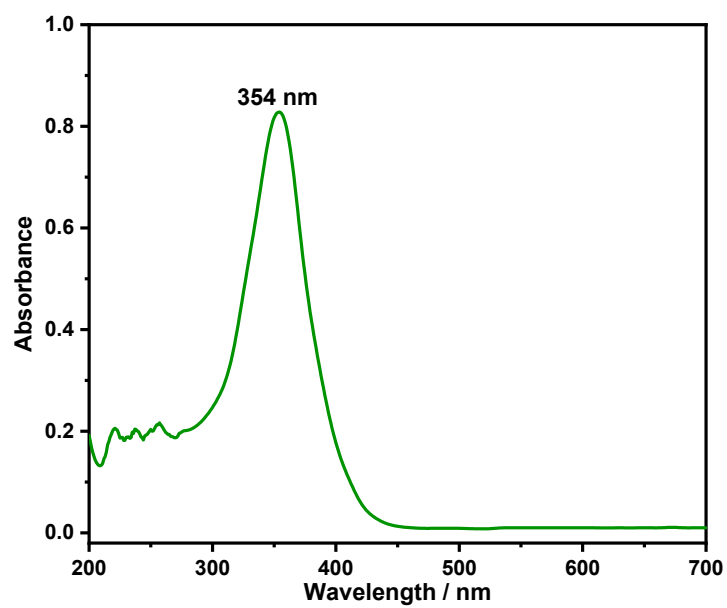

**Fig. S24** UV-vis absorption spectrum of the DL-COF-44.

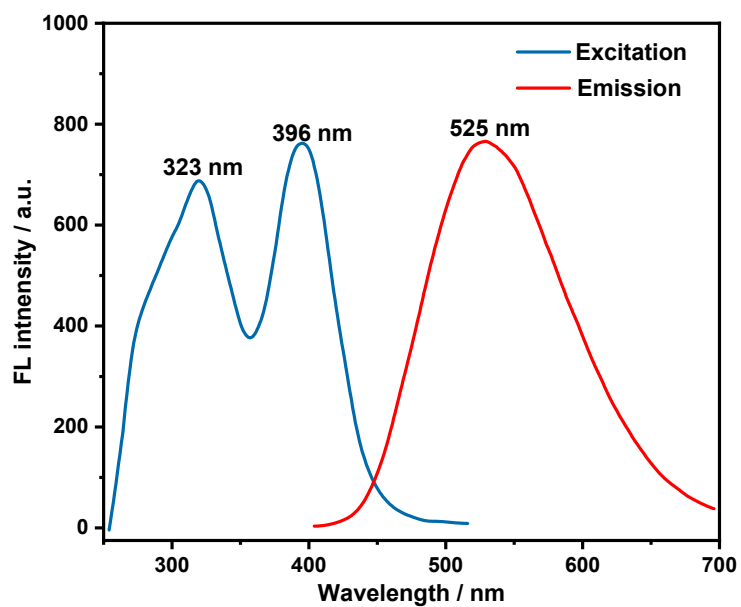

**Fig. S25** Fluorescence spectra of DL-COF-44 in DMF ( $\lambda_{\text{ex}} = 323 \text{ nm}$ ).

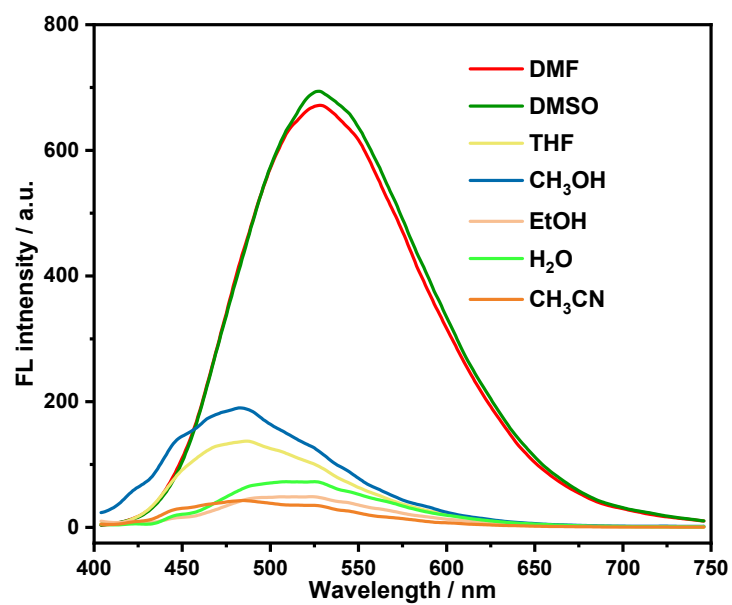

**Fig. S26** Fluorescence spectra of DL-COF-44 in different solvents.

## G. Fluorescence Detection of TC

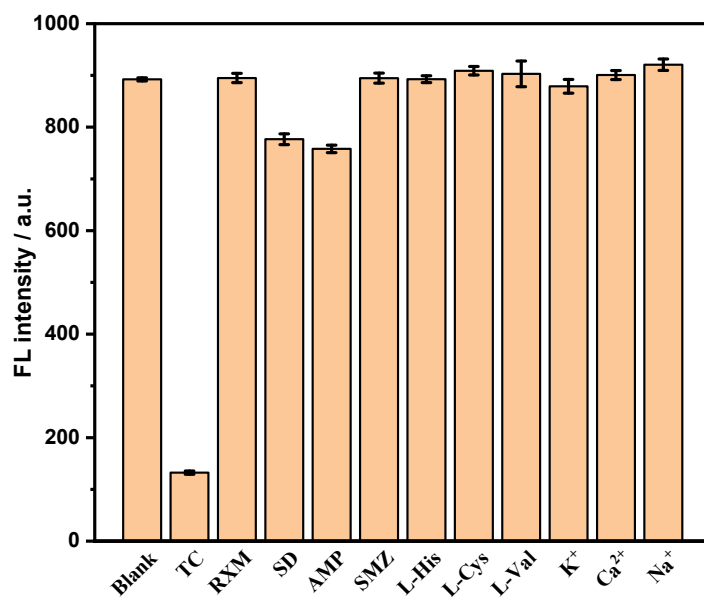

**Fig. S27** DL-COF-44 fluorescence sensor (0.02 mg/mL) for responses to TC (60  $\mu\text{M}$ ) and other analytes (120  $\mu\text{M}$ ) in DMF.

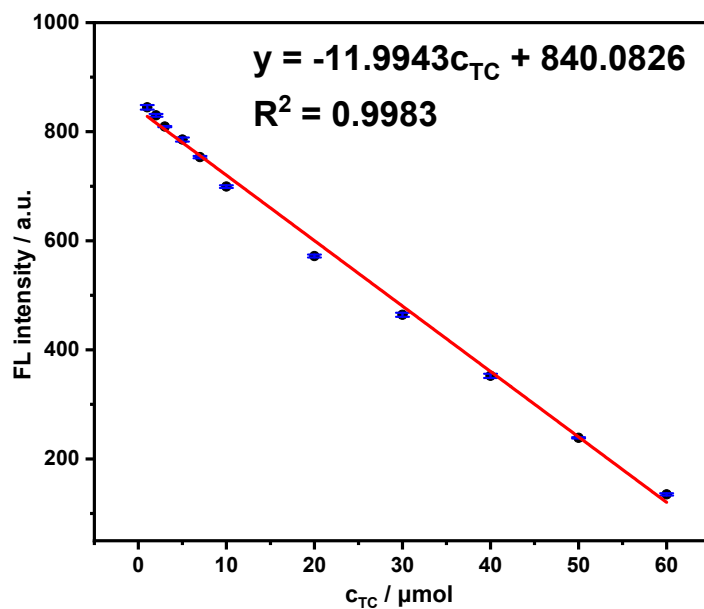

**Fig. S28** Linear fitting for the fluorescence intensity data from 0 to 60  $\mu\text{M}$  ( $R^2 = 0.9983$ , LOD = 0.404  $\mu\text{M}$ ).



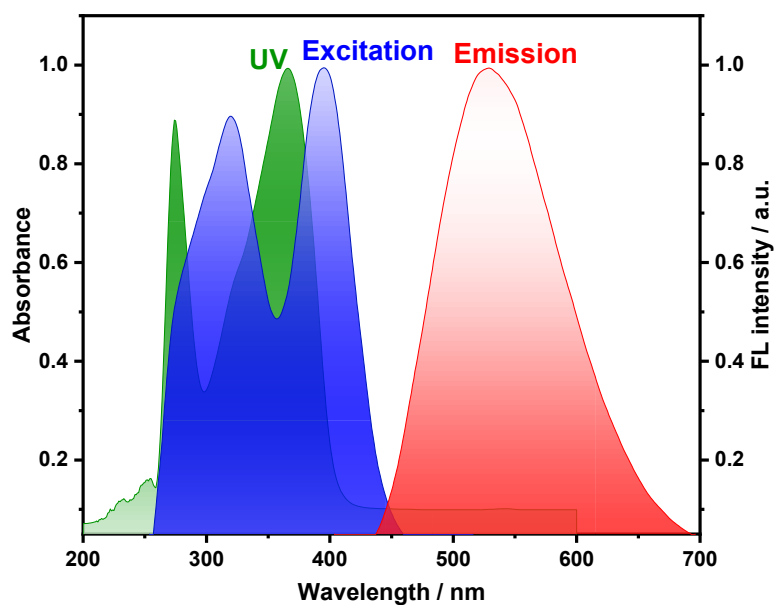

**Fig. S29** Normalized UV-vis absorption spectra of TC in DMF and normalized fluorescence excitation and emission spectra of DL-COF-44 in DMF.

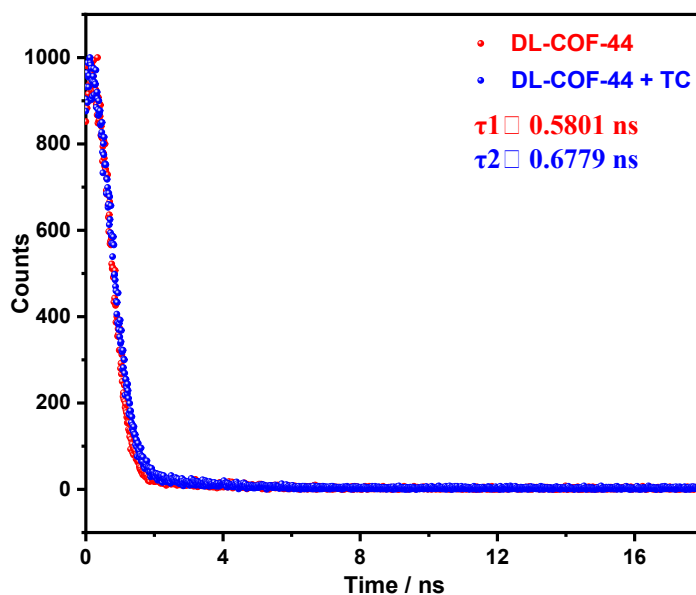

**Fig. S30** Comparison of fluorescence lifetime of DL-COF-44 before and after TC addition.
